# Supplementary material
Source: PubMed Central journal article supplement (PMC8017967)
Supplement: pnas.2015102118.sapp.pdf [file pnas.2015102118.sapp.pdf]

1 Neural divergence and hybrid disruption between ecologically isolated  
2 *Heliconius* butterflies

3

4 Stephen H Montgomery\*, Matteo Rossi, W. Owen McMillan, Richard M Merrill

5 \*s.montgomery@bristol.ac.uk

6

7 **SUPPLEMENTARY INFORMATION APPENDIX, CONTENTS:**

8

9 1. Neural divergence and speciation (supplementary introduction)

10

11 2. Materials and methods

12 i. Sampling of wild individuals

13 ii. Insectary reared individuals

14 iii. Neuroanatomy protocols

15 iv. Statistical analyses of neuropil volumes

16 v. RNA extraction and sequencing

17 vi. Statistical analyses of gene expression data

18

19 3. Supplementary Results

20 i. Intra-clade variation in brain morphology

21 ii. Tests of neutrality on neuropil volumes

22 iii. Hybrid disruption

23 iv. Divergence in gene expression

24 v. Classification of gene expression in F1 hybrids

25 vi. Tests of neutrality on gene expression

26 vii. Variation in PST and  $f_d$  among gene categories

27

28 4. Supplementary References

29

30 Supplementary Tables (separate .xls file)

31 i. Table S2: Neuroanatomy trait data

32 ii. Table S3: Metadata for gene expression samples

33 iii. Table S4: Neuroanatomy LMER results for wild caught samples

34 iv. Table S5: Neuroanatomy SMATR results for wild caught samples

35 v. Table S6: Neuroanatomy LMER and SMATR results for insectary reared samples

36 vi. Table S7: Hybrid disruption

37 vii. Table S8: Tests of neutrality on neuropil volumes

38 viii. Table S9: Differentially expressed genes with categorisation

39 ix. Table S10: Gene ontology enrichment

40 1. Neural divergence and speciation (supplementary introduction)

41 **Table S1:** Examples of neural divergence during ecological divergence between populations/species with incomplete reproductive isolation

42

| Species                       | Environmental context                                                       | Evidence for           |                                             |                                                                       |                                                   |                                                                            | Key references |
|-------------------------------|-----------------------------------------------------------------------------|------------------------|---------------------------------------------|-----------------------------------------------------------------------|---------------------------------------------------|----------------------------------------------------------------------------|----------------|
|                               |                                                                             | Neural divergence      | Heritable divergence                        | Selection                                                             | Hybrid effects                                    | Behavioural relevance                                                      |                |
| <b>A) Vertebrates</b>         |                                                                             |                        |                                             |                                                                       |                                                   |                                                                            |                |
| <i>Astyanax mexicanus</i>     | Micro-habitat divergence (surface/cave systems)                             | Brain morphology       | Confirmed using common garden experiments   | Not tested?                                                           | Evidence of intermediate traits inferred from [1] | Not tested, but likely linked to differences in use of sensory modalities. | [1–3]          |
| <i>Coregonus cupleaformis</i> | Micro-habitat divergence (limnetic/benthic)                                 | Neural gene expression | Confirmed using common garden experiments   | Overlap between eQTLs and peaks in genome-wide patterns of divergence | Misexpression of neural genes in hybrids          | Not tested, but likely linked to differences in use of sensory modalities. | [4,5]          |
| Cichlidae                     | Micro-habitat divergence (adaptive radiation)                               | Brain morphology       | Absent among congeneric sp., implied by [6] | Not tested?                                                           | Not tested?                                       | Links to brain morphology not tested but see [7]                           | [8,9]          |
| <i>Gasterosteus aculeatus</i> | Micro-habitat divergence (benthic/generalist)                               | Brain morphology       | Not tested?                                 | Not tested?                                                           | Not tested?                                       | Not tested?                                                                | [10]           |
| <i>Gasterosteus aculeatus</i> | Micro-habitat divergence (limnetic/benthic)                                 | Brain morphology       | Not tested?                                 | Not tested?                                                           | Not tested?                                       | Not tested?                                                                | [11]           |
| <i>Poecilia reticulata</i>    | Micro-habitat divergence (up/down stream and low/high predation)            | Brain morphology       | Not tested?                                 | Not tested?                                                           | Not tested?                                       | Not tested?                                                                | [12]           |
| <i>Poecilia mexicana</i>      | Micro-habitat divergence (surface/darkness/toxic hydrogen sulphide streams) | Brain morphology       | Rejected using common garden experiments    | Not tested?                                                           | Not tested?                                       | Not tested?                                                                | [13]           |
| <i>Pungitius pungitius</i>    | Micro-habitat divergence (river/lake/sea)                                   | Brain morphology       | Not tested?                                 | Not tested?                                                           | Not tested?                                       | Not tested?                                                                | [12]           |

## B) Invertebrates

|                                            |                                                                                                                                       |                                             |                                              |                                                                                           |                                                                            |                                                                                                                  |               |
|--------------------------------------------|---------------------------------------------------------------------------------------------------------------------------------------|---------------------------------------------|----------------------------------------------|-------------------------------------------------------------------------------------------|----------------------------------------------------------------------------|------------------------------------------------------------------------------------------------------------------|---------------|
| Culicidae                                  | Host shifts                                                                                                                           | Olfactory circuits                          | Inferred from lab experiments                | Not tested?                                                                               | Not tested?                                                                | Host odour detection                                                                                             | [15]          |
| <i>Drosophila melanogaster/sechellia</i>   | Host plant shifts                                                                                                                     | Olfactory circuits/antennal lobe morphology | Inferred from lab experiments                | Not tested?                                                                               | Not tested?                                                                | Host plant odour detection                                                                                       | [16,17]       |
| <i>Drosophila pseudoobscura/subobscura</i> | Micro-habitat divergence hypothesised, but there is limited ecological data and contemporary populations occur on separate continents | Brain morphology                            | Implied by using lab populations experiments | Not tested?                                                                               | Not tested?                                                                | Evidence for divergent mating behaviours, but no formal tests for an association with divergent brain morphology | [18]          |
| <i>Heliconius erato cyrbia/himera</i>      | Micro-habitat divergence                                                                                                              | Brain morphology                            | Confirmed using common garden experiments    | Not tested?                                                                               | Not tested?                                                                | Not tested?                                                                                                      | [19]          |
| <i>Heliconius melpomene/cydnio</i>         | Micro-habitat divergence                                                                                                              | Brain morphology, neural gene expression    | Confirmed using common garden experiments    | Evidence from PST/FST analyses and reduced gene flow around differentially expressed loci | Intermediate brain morphology and misexpression of neural genes in hybrids | Not tested, but likely linked to habitat dependent light regimes                                                 | Current study |
| <i>Rhagoletis pomonella</i>                | Host plant shifts                                                                                                                     | Olfactory circuits                          | Inferred from lab experiments                | Evidence of fitness trade offs [20]                                                       | Not tested?                                                                | Host plant odour detection                                                                                       | [21,22]       |

## 44 2. Materials and methods

45

### 46 2 i. Sampling of wild individuals

47 Although they began to diverge ~2 million years ago [23], *melpomene* and *cydno* have a long  
48 history of persistent gene flow [23,24], and in that sense speciation is considered to be  
49 incomplete. Distributed across Central and South America, the species boundary is  
50 maintained by ecological divergence and disruptive selection against hybrids [25–28], which  
51 now occur at low frequencies [29]. Although deep intra-clade splits are similar in age [23],  
52 populations of *melpomene* are currently ascribed to ‘races’ (defined by colour pattern  
53 variation), while several *cydno* lineages (*timareta*, *pachinus*) have been promoted to species  
54 level [30]. The geographic distribution of the *melpomene* and *cydno* clades allowed us to  
55 sample a series of populations, accounting for both geographic divergence on small and  
56 continental scales, as well as ecological divergence. All individuals were collected using hand  
57 nets and kept alive in glassine envelopes until brain tissue could be fixed within a few hours  
58 of collection. Sampling of wild individuals (Table S2) was focused on four countries:

59

#### 60 Panama

61 In Panama, *H. c. chioneus* is found in closed forest habitats whereas *H. m. rosina*, occurs in  
62 secondary forest [25,31]. We sampled 10 individuals of each species along Pipeline road,  
63 Gamboa (elevation 60 m), which transects open to closed forest, and the nearby Soberanía  
64 National Park. Samples were collected under permits SEX/A-3-12, SE/A-7-13 and SE/AP-14-  
65 18.

66

#### 67 Peru

68 *H. timareta* is a member of the *cydno* clade restricted to mid-elevation forest on the eastern  
69 Andes. In Peru, *H. t. thelxinoe* is in mosaic sympatry with *H. m. amaryllis*, with which it shares  
70 a co-mimetic wing pattern. Like low-elevation *H. cydno*, *H. timareta* is specialised for closed  
71 forests [26,32], suggesting micro-habitat partitioning from *H. melpomene* is maintained across  
72 the *cydno* clade. Because they are isolated by ecology but not by mimicry ring, this pair  
73 provides a ‘control’ for neuroanatomical divergence associated with visual mate cues. 10  
74 individuals of each species were sampled in the Escalera region near Tarapoto, Departamento  
75 de San Martín (elevation 300-1295 m). Samples were collected under permits 0289-2014-  
76 MINAGRI-DGFFS/DGEFFS, 020-014/GRSM/PEHCBM/DMA/ACR-CE, 040-  
77 2015/GRSM/PEHCBM/DMA/ACR-CE, granted to Dr Neil Rosser.

78

79

## 80 **Costa Rica**

81 *H. c. galanthus* and *H. pachinus* are parapatric species, within the *cydno* clade, that are  
82 restricted to opposite coastal drainages in Costa Rica. In spite of evidence for ongoing gene  
83 flow, few hybrids have been collected suggesting that strong reproductive isolation maintains  
84 the species barrier [33,34]. Except for differences in colour pattern, there are no known  
85 ecological differences between the two taxa suggesting they are ecologically equivalent and  
86 the product of allopatric speciation across the Central Valley [33–35]. This provides a ‘control’  
87 speciation event where we do not expect neuroanatomical divergence between species. 10  
88 *H. c. galanthus* were sampled at La Selva Biological Station (elevation 30-130 m) and Orosí  
89 (elevation ~1300 m). 10 *H. pachinus* were sampled at Las Cruces Biological Station (elevation  
90 <20 m) and Le Leona eco-lodge on the edge of Corcovado National Park (elevation ~1000  
91 m). A small number of *H. m. rosina* were also collected from these locations. Samples were  
92 collected under permit SINAC-SE-GASP-PI-R-2015.

93

## 94 **French Guiana**

95 At the eastern extreme of its geographic distribution, *H. melpomene* is allopatric with *cydno*.  
96 *H. m. melpomene* shares its general ecology with its western relatives, with some exceptions.  
97 *H. m. melpomene* is more oligophagus in its larval food plants [36] and there is some  
98 suggestion that it uses the forest interior to a greater extent [37], although data supporting this  
99 observation is lacking. As we sampled 10 *H. m. melpomene* from forest edge habitats in the  
100 Arrondissement of Cayenne (elevation 0-150m), we consider them to have been exposed to  
101 similar micro-habitats as *melpomene* in Peru and Panama. We therefore use this population  
102 to construct a test of character displacement in brain morphology between sympatric  
103 *melpomene/cydno* species. At the time of sampling no permits were required to sample  
104 outside National Parks in French Guiana.

105

## 106 **2 ii. Insectary reared animals**

107 To determine whether any variation we observed was due to environmentally-induced  
108 plasticity, we performed common garden experiments focusing on the Panamanian species  
109 pair, *H. c. chioneus* and *H. m. rosina*. Insectary-reared individuals were obtained from wild-  
110 caught females. Adults were kept under standard conditions in outbred stock cages (c. 1 x 2  
111 x 2 m) of mixed sex and equal densities at the Smithsonian Tropical Research Institute’s  
112 Gamboa insectaries. These cages are maintained on the edge of the butterfly’s native habitat,  
113 and light conditions do not substantially deviate from the forest edge environment. Stock  
114 cages contained a minimum of 10 females. Because *H. m. rosina* are monophagus, larvae  
115 were reared on the species’ preferred host plant (*Passiflora menispermifolia* and *P. triloba*  
116 respectively). To assess whether hybrid individuals show intermediate or disrupted

117 phenotypes we produced multiple *H. c. chioneus* x *H. m. rosina* crosses in both directions,  
118 during two distinct field seasons (2013, 2019). Samples from the 2013 crosses were used for  
119 neuroanatomical measurements, while samples from both sets were used to collect gene  
120 expression data. We focus on F1 individuals because they represent a large portion  
121 of hybrids found in natural *Heliconius* hybrids [29] and must survive to produce back crosses  
122 with parental species. F1 larvae were reared on *P. triloba*. For both pure species and hybrid  
123 crosses, eggs were collected from the host plants on a daily basis over an ~8-week period,  
124 and isolated until hatching. Individual larvae were then raised on new growth shoots in outdoor  
125 larval cages. After eclosion, adults were aged for 2-3 weeks for the neuroanatomical samples,  
126 and 9-15 days for gene expression samples (Table S2, S3). Both sexes are sexually and  
127 behaviourally mature at ~8 days [38].

128

### 129 **2 iii. Neuroanatomy protocols**

130 Brains were fixed *in situ* using a ZnCl<sub>2</sub>-formaldehyde solution, following Ott [39]. Further  
131 methodological details and anatomical descriptions of the *Heliconius* brain are available in  
132 Montgomery et al. [40]. Briefly, brain structure was revealed using immunofluorescence  
133 staining against a vesicle-associated protein at presynaptic sites, synapsin (anti-SYNORF1;  
134 obtained from the Developmental Studies Hybridoma Bank, University of Iowa, Department of  
135 Biological Sciences, Iowa City, IA 52242, USA; RRID: AB\_2315424) and Cy2-conjugated  
136 affinity-purified polyclonal goat anti-mouse IgG (H+L) antibody (Jackson ImmunoResearch  
137 Laboratories, West Grove, PA), obtained from Stratech Scientific Ltd., Newmarket, Suffolk,  
138 UK (Jackson ImmunoResearch Cat No. 115-225-146, RRID: AB\_2307343). All imaging was  
139 performed on a confocal laser-scanning microscope (Leica TCS SP5 or SP8, Leica  
140 Microsystem, Mannheim, Germany) using a 10x dry objective with a numerical aperture of 0.4  
141 (Leica Material No. 11506511), a mechanical z-step of 2µm and an x-y resolution of 512 x 512  
142 pixels. The z-dimension was scaled by 1.52 to correct the artefactual shortening [40]. We  
143 assigned image regions to brain components, or neuropils, using the Amira 5.5 (Thermo  
144 Fisher Scientific) *labelfield* module and defining outlines based on the brightness of the  
145 synapsin immunofluorescence. We reconstructed total central brain volume (CBR), six paired  
146 neuropils in the optic lobes (OL), six paired and one unpaired neuropils in the central brain  
147 (CBR) in all wild individuals, using the *measure statistics* module to estimate component  
148 volumes. In insectary samples the POTu, a small posteriorly located neuropil, was  
149 inconsistently stained and was not measured, and in hybrids only neuropils with evidence of  
150 divergence between *melpomene* and *cydno* were segmented. The total volume of segmented  
151 structures in the CBR was subtracted from total CBR volume to obtain a measure of the  
152 remaining, unsegmented CBR (rCBR), which is used as an allometric control throughout. Note  
153 that in insectary samples rCBR does not include POTU, and among comparisons including

154 hybrids rCBR is simply CBR minus AOTU volume. Due to the lack of volumetric asymmetry in  
155 *Heliconius* neuropils [40] we measured the volume of paired neuropils from one hemisphere,  
156 chosen at random unless one hemisphere was damaged, and multiplied the measured volume  
157 by two. All volumes were  $\log_{10}$ -transformed before data analysis.

158

#### 159 **2 iv. Statistical analyses of neuropil volumes**

160 We identified non-allometric differences between brain component sizes using nested linear  
161 models, analysed in the lme4 R package [41]. Linear models included each brain component  
162 as the dependent variable, rCBR and taxonomic/experimental grouping as an independent  
163 variable, with sex and country (where relevant) included as random factors. The likelihoods of  
164 nested models were compared using a  $\chi^2$ -test. Correction for multiple testing was performed  
165 using a sequential Bonferroni procedure [42]. For neuropils showing a significant  
166 clade/species effect, we subsequently explored the scaling parameters responsible for group  
167 differences using SMATR v.3.4-3 [43]. Using the standard allometric scaling relationship:  $\log$   
168  $y = \beta \log x + \alpha$ , where  $y$  is the brain component of interest and  $x$  is rCBR, we performed tests  
169 for significant shifts in the allometric slope ( $\beta$ ) between taxa, followed by two further tests which  
170 assume a common slope: 1) for differences in  $\alpha$  that suggest discrete 'grade-shifts' in the  
171 relationship between two variables, 2) for major axis-shifts along a common slope. Deviation  
172 from a shared scaling relationship, by slope or elevation, can indicate an adaptive change in  
173 the functional relationship between two brain structures [44].

174 In addition to our allometrically controlled regressions, we performed two further  
175 analyses to explore the role of selection in neuroanatomical divergence. First, using data from  
176 wild-caught samples, we performed a Mantel test between pairwise differences in neuropil  
177 volumes and two estimates of  $F_{ST}$  from Arias et al. [30], based on AFLPs and mtDNA. *H. m.*  
178 *amaryllis* was not included in Arias et al. we therefore use *H. m. malleti* as a surrogate, as  
179 these two colour pattern races are geographically and phylogenetically close [45]. Pairwise  
180 differences in neuropil volumes were taken as  $\log_{10}(|\text{Population}_A - \text{Population}_B| + 1)$ . Partial  
181 Mantel tests, controlling for pairwise differences in rCBR volumes, were performed using  
182 ECODIST [46] with Pearson correlations and 1000 permutations.

183 Second, with insectary reared samples, we calculated  $P_{ST}$  using the PSTAT package  
184 [47] initially using a  $c/h^2$  ratio of 1, where  $c$  is the proportion of the total variance presumed to  
185 be due to additive genetic effects across populations, and  $h^2$  is the trait heritability. Quantitative  
186 genetic parameters for invertebrate neuroanatomy are sorely lacking in the literature, with only  
187 a small number of heritability estimates (0.123-0.376) for linear dimensions of *Drosophila*  
188 mushroom body size [48]. We therefore also varied the  $c/h^2$  ratio assuming  $c$  equals 0.25,  
189 0.50, 0.75, 1.00, and  $h^2$  equals 0.25, 0.50, 0.75, resulting in ratios of (0.33, 0.67, 1.00, 1.33,  
190 1.50, 2.00, 3.00, 4.00) to test how sensitive the  $P_{ST}$  estimates are to these assumptions.  $P_{ST}$

191 calculations were performed on raw, log<sub>10</sub>-transformed neuropil volumes, and on residual  
192 volumes after regressing neuropil volumes against rCBR using the res() function. To test if an  
193 individual neuropil's P<sub>ST</sub> was significantly higher than expected by neutral divergence, we  
194 calculated a p-value as the proportion of the F<sub>ST</sub> distribution [24] (see below) that was above  
195 each P<sub>ST</sub> value, where a P<sub>ST</sub> value above the 95<sup>th</sup> percentile of the F<sub>ST</sub> distribution is taken as  
196 evidence of selection.

197 Finally, we identified intermediate traits in hybrids we also performed Principal  
198 Component Analysis and ANOVAs among parental and hybrid individuals, with post-hoc  
199 Tukey tests to compare group means, using base R packages [49] (R Core Team, 2013).

200

## 201 **2 v. RNA extraction and sequencing**

202 All samples used for our comparative transcriptomics were reared in common garden  
203 conditions (see above). Brains were dissected out of the head capsule in cold (4 °C) 0.01M  
204 PBS solution and include the CBR, OL and ommatidia. Full details of library preparation and  
205 sequencing are available in Rossi et al. [50], but briefly, in 2014, mRNA was extracted from  
206 whole brains of age-matched *H. c. chioneus* (n = 11), *H. m. rosina* (n = 12), and F1 hybrids in  
207 2014 (n = 4), using TRIzol Reagent (Thermo Fisher, Waltham, MA, USA) and a RNeasy kit  
208 (Qiagen, Valencia, CA, USA). Samples were treated with DNase I (Ambion, Darmstadt,  
209 Germany), and Illumina libraries were prepared and sequenced with 100bp paired-end reads  
210 at Edinburgh Genomics (Edinburgh, UK). In 2019, mRNA was extracted from whole brains of  
211 age-matched *H. c. chioneus* (n = 5), *H. m. rosina* (n = 5), and F1 hybrids (n = 12), using TRIzol  
212 Reagent and a PureLink RNA Mini Kit, with PureLink DNase digestion on column (Thermo  
213 Fisher, Waltham, MA, USA). Illumina 150bp paired-end RNA-seq libraries were prepared and  
214 sequenced at Novogene (Hong Kong, China).

215 After trimming adaptor and low-quality bases from raw reads using TrimGalore v.0.4.4  
216 ([www.bioinformatics.babraham.ac.uk/projects](http://www.bioinformatics.babraham.ac.uk/projects)), Illumina reads were mapped to the *H.*  
217 *melpomene* 2 genome [51]/*H. melpomene* 2.5 annotation [52] using STAR v.2.4.2a in 2-pass  
218 mode [53]. We kept only reads that mapped in 'proper pairs', using Samtools [54]. The number  
219 of reads mapping to each gene was estimated with HTseq v. 0.9.1 (model = union) [55].

220

## 221 **2 vi. Statistical analyses of gene expression data**

222 Differential gene expression analyses between groups were conducted in DESeq2 [56],  
223 including sex and sequencing batch as random factors. We considered only those genes  
224 showing a 2-fold change in expression level, and at adjusted (false discovery rate 5%) p-  
225 values < 0.05, to be differentially expressed due to the potential for tissue composition to drive  
226 significant, but low-fold change differences in expression [57].



227 We conducted a Principal Component Analysis on rlog-transformed gene count data  
228 (as implemented in DESeq2) to inspect clustering of expression profiles among groups  
229 (species, or hybrids) for all genes, and for differentially expressed genes only.

230 We performed ANOVAs on normalized gene expression counts of species and  
231 hybrids, with post-hoc Tukey tests, and categorized gene expression levels in hybrids as  
232 follows:

- 233 1. “*melpomene*-like”: where F1 vs. *cydno*  $p < 0.05$  and F1 vs *melpomene*  $p > 0.05$
- 234 2. “*cydno*-like”: where F1 vs. *cydno*  $p > 0.05$  and F1 vs *melpomene*  $p < 0.05$
- 235 3. “intermediate”: where F1 vs. *cydno*  $p > 0.05$  and F1 vs *melpomene*  $p > 0.05$ , **or** *cydno*  
236  $p < 0.05$  and F1 vs *melpomene*  $p < 0.05$ , with F1s having an intermediate mean  
237 expression level between parental species
- 238 4. “transgressive”: where *cydno*  $p < 0.05$  and F1 vs *melpomene*  $p < 0.05$ , with F1 having  
239 higher or lower mean expression compared to both parental species.

240 We estimated phenotypic differentiation in gene expression ( $P_{ST}$ ) from normalized  
241 gene counts in *H. m. rosina* and *H. c. chioneus*, following Uebbing et al. [58]. For the main  
242 analysis we set heritability to be 0.5, but examined the effects of varying heritability in the  
243 supplementary results. The distribution of genome-wide genetic differentiation ( $F_{ST}$ ) between  
244 *H. m. rosina* and *H. c. chioneus* were retrieved from Martin et al. [24]. To test if an individual  
245 gene’s  $P_{ST}$  was significantly higher than expected by neutral divergence, we calculated p-  
246 values as the proportion of the  $P_{ST}$  distribution that was above each  $F_{ST}$  value. ( $P_{ST}$  values  
247 above the 95<sup>th</sup> percentile of the  $F_{ST}$  distribution, were considered as showing evidence of  
248 selection). We subsequently explored how the frequency of this index of selection varied  
249 between gene expression categories (differentially expressed or not, and hybrid categories as  
250 defined above) by comparing the proportion of genes showing  $P_{ST} > F_{ST} q(95\%)$ , in the various  
251 gene categories).

252 To further test whether genes highlighted by these analyses contribute to divergence  
253 between *melpomene* and *cydno*, we asked whether genes with  $P_{ST} > F_{ST} q(95\%)$ , or with  
254 intermediate expression in hybrids, were more likely to occur in regions of the genome with  
255 low levels of gene flow. We retrieved estimated admixture proportions ( $f_d$ ) between *H. m.*  
256 *rosina* and *H. c. chioneus*, and population recombination rates ( $\rho$ ) from Martin et al. [59].  
257 We then investigated the relationship between  $f_d$  (estimated in 100kb non-overlapping  
258 windows) and  $P_{ST}$ , accounting for variation in recombination rate, as a way to study whether  
259 selection acts against introgression of foreign alleles. In this analysis, we fitted the following  
260 generalized linear mixed models (glmm):  $f_d \sim \rho + P_{ST} + (1|chromosome)$ , assuming a  
261 Gaussian distribution. We also explored whether genes with intermediate expression in F1s

262 showed higher levels of  $P_{ST}$ , and lower levels of  $f_d$ , compared to other genes, with glmm  
263 models:  $intermediate\_Y\_or\_N \sim X + (1|chromosome)$ , where  $X = f_d$  or  $P_{ST}$ , assuming a binomial  
264 distribution. Inclusion of chromosome as a random factor provides partial correction for the  
265 effects of physical linkage between sites, however, we acknowledge this analysis may still be  
266 prone to inflated effect sizes due to non-independence of genomic regions. To test for  
267 differences in levels of  $P_{ST}$  and  $f_d$  values among all gene categories we conducted a Kruskal-  
268 Wallis test with post-hoc Dunn test (with Bonferroni correction).

269 Finally, to infer possible overrepresentation of specific molecular functions among  
270 gene categories, we first used InterProScan v.5 [60] to retrieve gene ontology (GO) terms  
271 associated with every gene annotated in the Hmel2.5 genome. We then conducted a gene set  
272 enrichment analysis (Fisher's exact test,  $p < 0.01$ ) with the TopGO package in R [61], using  
273 the "elim" algorithm, which corrects for non-independence among GO terms. We identified GO  
274 term enrichment tests for differentially expressed genes, genes showing intermediate  
275 expression in F1 hybrids, and genes with  $P_{ST} > F_{ST} q(95\%)$ , relative to all other genes, using  
276 Fisher's exact tests at  $\alpha = 0.05$ .

277

278

279

280

281

282

283

284

285

286

287

288

289

290

291

292

293

294

295

296

### 297 3. Supplementary results

298

#### 299 3 i. Intra-clade variation in brain morphology

300 In *cydno*, no neuropil shows significant intra-clade divergence in scaling with an allometric  
301 control (Table S4B, Table S5B), whereas several do in *melpomene*. Below, we illustrate this  
302 difference with two neuropils, the medulla (A,C) and AOTU (B,D). Post-hoc tests in SMATR  
303 (following Table S5B) identify no significant shifts in the *cydno* clade for either the medulla  
304 (figure S1A) or AOTU (Figure S1B), consistent with our lme4 analyses (Table S4B). In the  
305 *melpomene* clade, *H. m. rosina* has a divergent slope from *H. m. amaryllis* for the medulla ( $X^2$   
306 = 4.096,  $p = 0.043$ ), but this difference is not significant compared to *H. m. melpomene* ( $X^2 =$   
307 2.585,  $p=0.108$ ) (Figure S1C). However, *H. m. melpomene* does have major-axis shift in  
308 medulla size relative to *H. m. amaryllis* (Wald-statistic = 21.235,  $p<0.001$ ) and *H. m. rosina* ( $X^2$   
309 = 7.386,  $p = 0.007$ ) consistent with coordinated expansion of the medulla and rCBR (Figure  
310 S1C). For the AOTU (Figure S1D), *H. m. rosina* has a divergent scaling relationship with  
311 rCBR compared to *H. m. amaryllis* ( $X^2 = 8.382$ ,  $p = 0.004$ ) and, to a lesser extent, *H. m.*  
312 *melpomene* ( $X^2 = 3.352$ ,  $p = 0.067$ ), whereas *H. m. amaryllis* and *H. m. melpomene* have  
313 grade shift on the  $y$ -axis (test=6.908,  $p=0.009$ ) indicating non-allometric variation in AOTU  
314 size between these population.

315

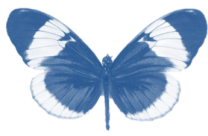

*cydno* clade

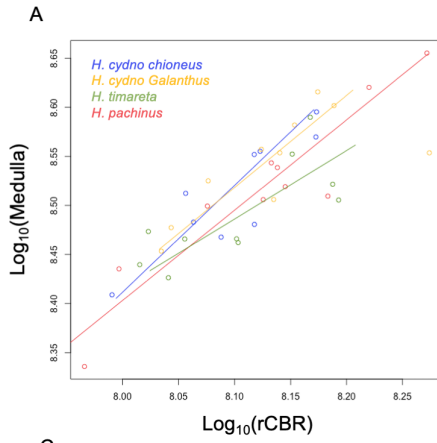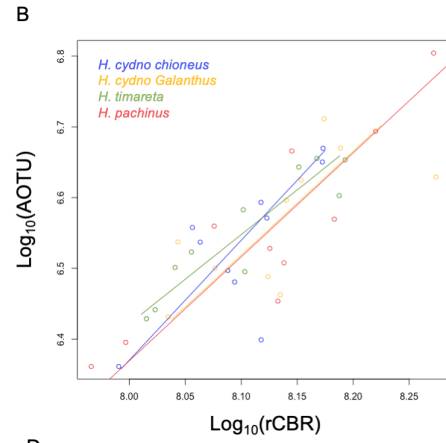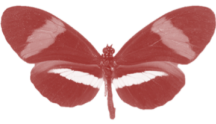

*melpomene* clade

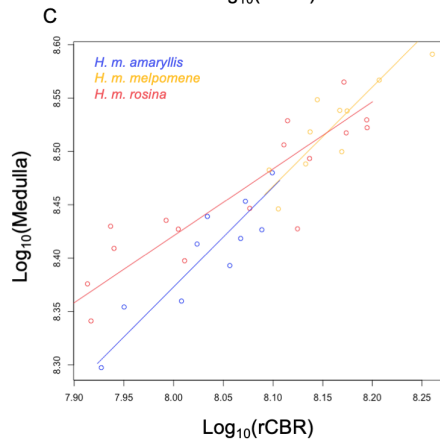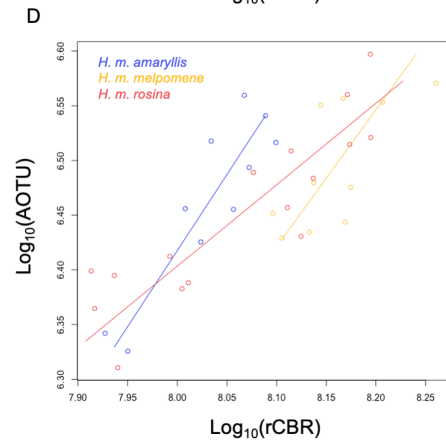

316

317 **Figure S1.** Example of intra-clade variation in neuropil scaling in the *cydno* (A,B) and  
318 *melpomene* (C,D) clades for the medulla (A,C) and AOTU (B,D). See also Table S4B and  
319 Table S5B.

320

321

322

323

324

325

326

327

328

329

330

331

332

333

334

335

336

### 337 **3 ii Tests of neutrality on neuropil volumes**

338 Pairwise volumetric differences in the visual neuropils, or total optic lobe volume, are not  
339 generally associated with  $F_{ST}$  across populations (Table S8A). Although power is likely limited  
340 by the number of populations, the only neuropils that suggest a relationship between trait  
341 divergence and  $F_{ST}$  are the lobula (LOB), antennal lobe (AL) and both mushroom body  
342 components (MBCA, MBLOPE), with only LOB showing an association at  $p < 0.05$  for  $F_{ST}$   
343 estimates from both mtDNA and AFLP data. None of these four neuropils show evidence of  
344 non-allometric shifts in relative size between the *melpomene* and *cydno* clades. In contrast,  
345 all neuropils that show this pattern of divergence lack associations with  $F_{ST}$ . Under the  
346 association phenotypic drift is linearly associated with neutral genetic divergence this provides  
347 evidence for a role of selection in driving divergence in brain composition across the *cydno-*  
348 *melpomene* clade.

349  $P_{ST}$  estimates based on comparisons between *H. m. rosina* and *H. c. chioneus* reared  
350 in common-garden conditions are consistent with this interpretation (Table S8B). With the  
351 exception of components of the central complex (PB and CB) all  $P_{ST}$  estimates for raw  
352 volumes are above the 95<sup>th</sup> percentile of the  $F_{ST}$  distribution, most likely reflecting divergence  
353 in total brain size. However, after accounting for allometric variation through regressions  
354 against central brain volume (rCBR), significant  $P_{ST} > F_{ST}$  effects are only detected for total  
355 optic lobe size (OL), lamina (LAM), medulla (ME), lobula (LOB), ventral lobe of the lobula  
356 (vLOB), and the anterior optic tubercle (AOTU). All are robust to correcting for multiple tests.  
357 Varying the  $c/h^2$  ratio suggests these results are widely robust to assumptions about the  
358 proportion of genetic variance and heritability (Table S8C). All significant  $P_{ST} > F_{ST}$  results are  
359 recovered except under low a  $c/h^2$  ratio, where the proportion of total variance accounted for  
360 by additive genetic variance is low, and heritability is high. A scenario we suspect is unlikely.  
361 Even under this scenario, LAM, vLOB and AOTU show significant  $P_{ST} > F_{ST}$  results before  
362 correcting for multiple tests. Under high  $c/h^2$  ratios above 1, the lobula plate (LOP) also has  
363 significant  $P_{ST} > F_{ST}$ .

364 Taken together at least LAM, ME, vLOB, aME and AOTU show greater degrees of  
365 phenotypic divergence between Panamanian *H. m. rosina* and *H. c. chioneus*, and an absence  
366 of an association with neutral divergence across the *cydno-melpomene* clade, which is highly  
367 suggestive of adaptive evolution, which ultimately affects overall OL size. Our data also  
368 suggests that the LOP and LOB have been under divergent selection between *melpomene*  
369 and *cydno*, but potentially with less consistency across the clade.

370  
371  
372  
373

374 **3 iii. Hybrid disruption**

375 In addition to having intermediate volumes relative to rCBR volume, hybrids also show some  
 376 evidence of intermediate scaling between pairs of neuropils. Scaling analyses between pairs  
 377 of visual neuropils in SMATR identify several comparisons with significant deviation in scaling  
 378 across parental species and F1 hybrids, affecting either the slope or elevation of the scaling  
 379 relationship (Table S7Di, Dii). Many of these cases reflect pairs of neuropils with direct  
 380 connections in other insects, including the LOB and vLOB [62], ME and AOTU [63], LOB and  
 381 AOTU [63], LAM and aME [64], or where there are likely indirect functional connections, e.g.  
 382 LAM and LOP, which are connected via projections to the MED [65], or the aME and AOTU  
 383 which both process polarised light [64,66,67].

384 Post-hoc analyses of tests with  $p < 0.10$  suggest that F1 hybrids show potentially  
 385 intermediate scaling relative to *cydno* and *melpomene*. For example, the elevation constant  
 386 for scaling between the LAM and aME in F1 hybrids is intermediate between *H. cydno* and *H.*  
 387 *melpomene*, although in both cases it is marginally non-significant (*H. cydno* wald = 3.665,  $p$   
 388 = 0.056; *H. melpomene* wald = 3.758,  $p$  = 0.053; Figure S1A). In other cases, scaling in F1  
 389 hybrids is significantly different from one parental species, but not both (Table S7D iii; Figure  
 390 S1B,C). However, different pairs of neuropils show different parental similarities, with some  
 391 scaling like *H. melpomene* (e.g. aME~AOTU), while other scale like *H. cydno* (e.g.  
 392 aME~VLOB, LAM~LOB). We suggest that this provides a second potential avenue for hybrid  
 393 disruption if information flow between multiple neuropils are unbalanced.

394

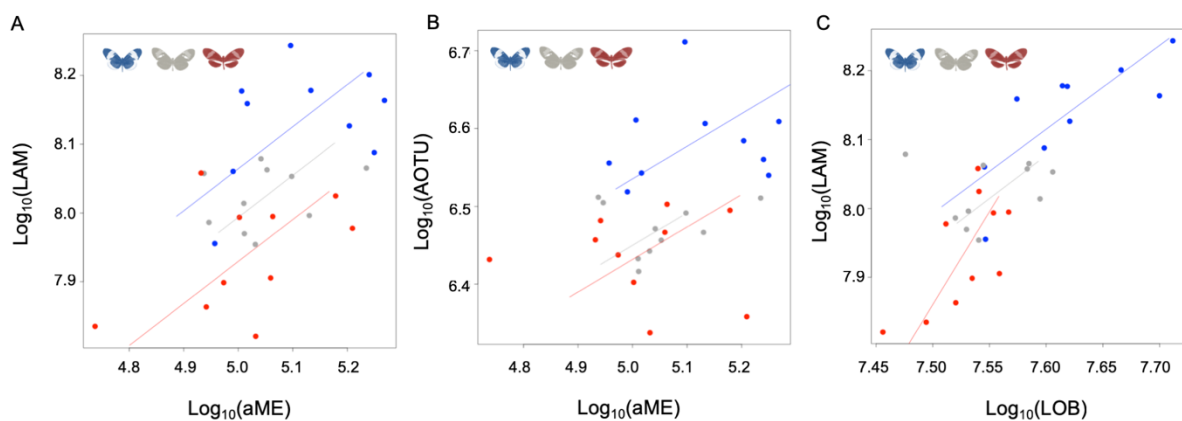

395 **Figure S2.** Examples of scaling between pairs of neuropils: A) LAM~aME (intermediate), B)  
 396 AOTU~aME (*melpomene*-like); C) LAM~LOB (*cydno*-like).  
 397

398

399

400

401

402 **3 iv. Divergence in gene expression**

403

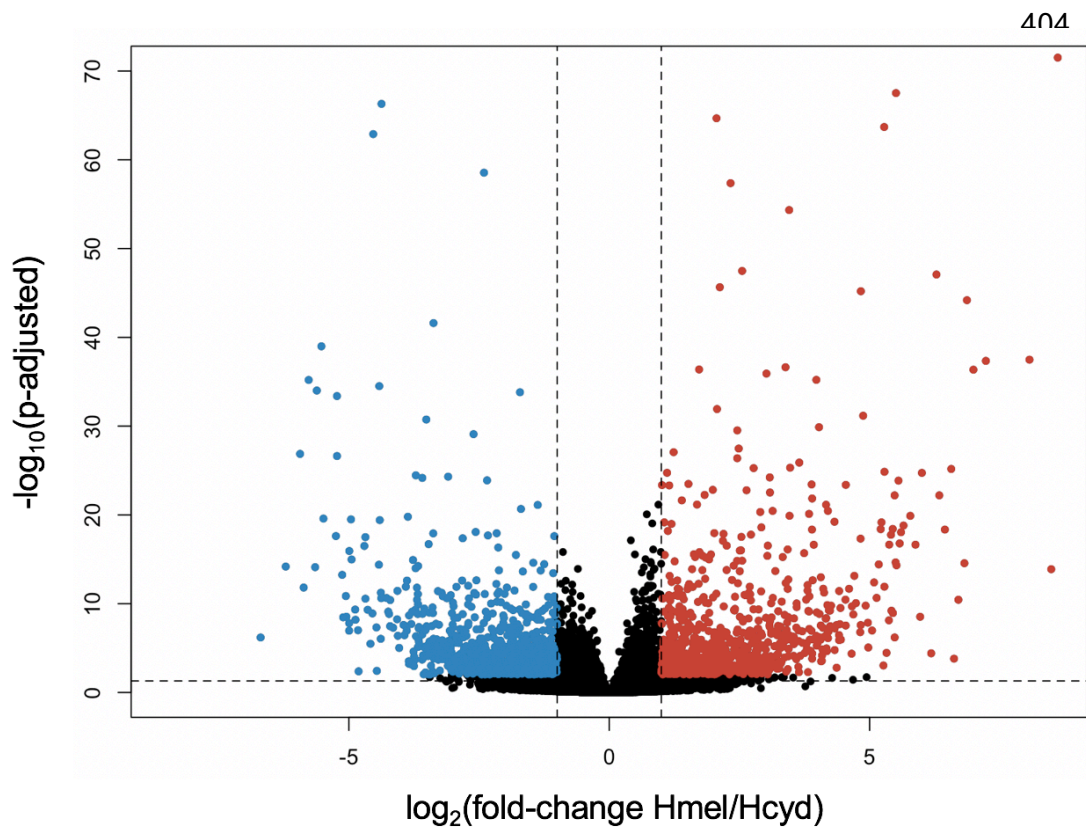

423 **Figure S3.** Volcano plot for neural gene expression comparisons between *Heliconius*  
424 *melpomene* and *H. cydno*. Vertical dotted lines indicate the thresholds of a 2-fold change in  
425 expression (at x values of -1 and 1), the horizontal dotted line indicates significance (p-  
426 adjusted<0.05) in the test for differential expression (as conducted in DESeq2). Differentially  
427 expressed genes are colored in blue if up-regulated in *cydno*, and red if up-regulated in  
428 *melpomene*. Note that 3 outliers (with very low associated p-values) were removed for clarity.  
429

430

431

432

433

434

435

436

437

438

439

440

441

442

443  
444  
445  
446  
447  
448  
449  
450  
451  
452  
453  
454  
455  
456  
457  
458  
459  
460  
461  
462  
463  
464  
465  
466  
467  
468  
469  
470  
471  
472  
473  
474  
475  
476  
477  
478

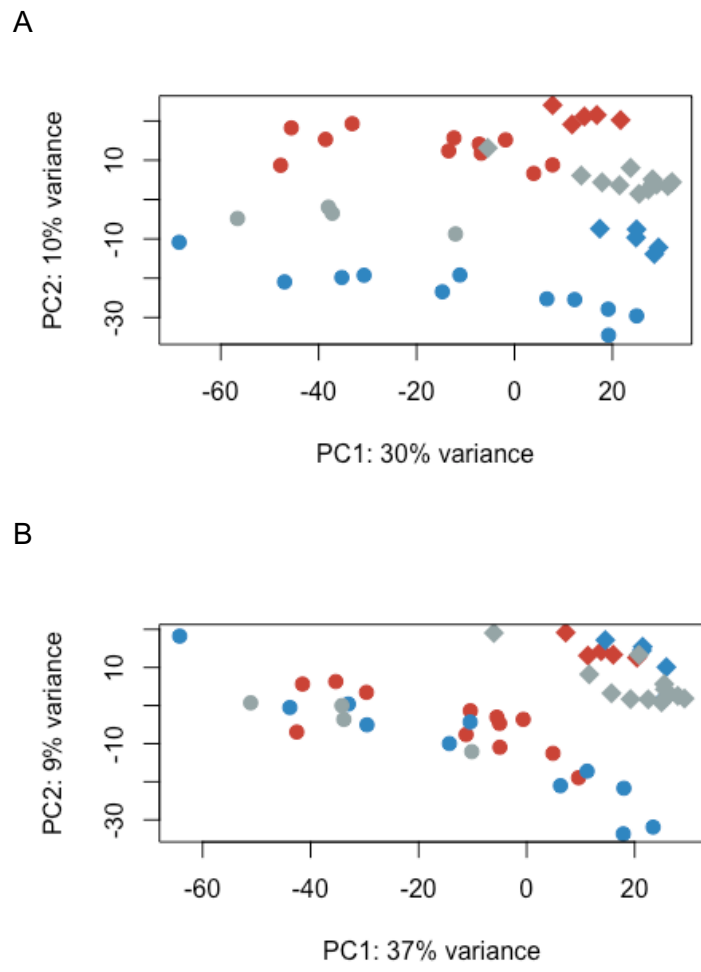

**Figure S4.** Principal component analyses of expression level profiles of (A) all genes and of (B) genes that were not detected as differentially expressed (see also, Figure 4). *H. cydno* samples are colored in blue, F1 hybrids in gray, *H. melpomene* in red. Hybrids show reduced intermediarity in gene expression level when taking all genes into account, and are not intermediate when non-differentially expressed genes are analysed. However, a trend for dominance of the *melpomene* alleles is also evident across all genes (of all genes: 8.7% are *melpomene-like*, 7.5% *cydno-like*, 3.9% statistically intermediate, 1.3% transgressive, 78.3% show no difference between species), Sequencing batch is denoted by the dot shape: circular (batch 2014) and rhomboid (batch 2019).



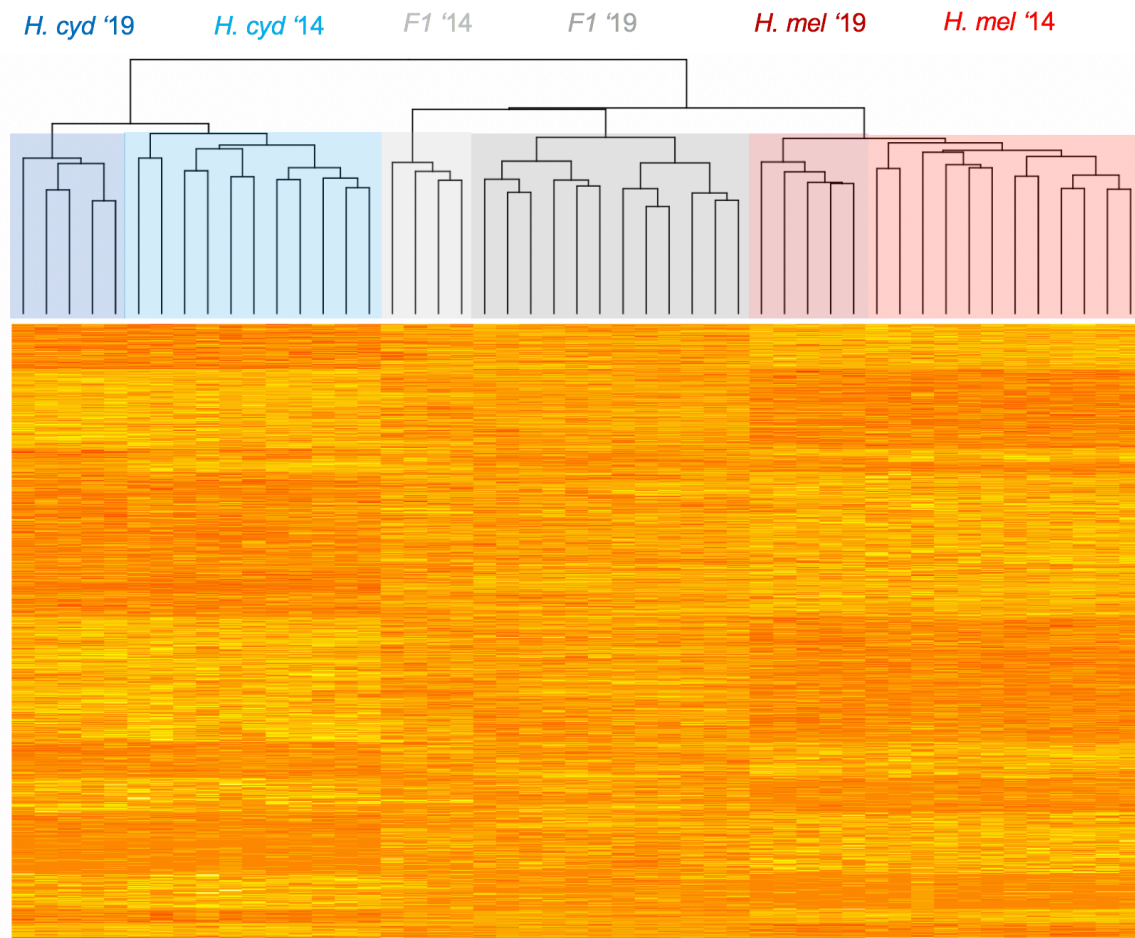

479

480 **Figure S5.** Dendrogram of neural expression profiles for *H. cydno*, F1 hybrids and *H.*  
 481 *melpomene*, for genes detected to be differentially expressed between *cydno* and *melpomene*  
 482 (different sequencing batches, 2014 and 2019, are highlighted with different shades of blue  
 483 for *H. cydno*, gray for F1s, and red for *H. melpomene*).  
 484

484

485

486

487

488

489

490

491

492

493

494

495

496

497

498 **3 v. Classification of gene expression in F1 hybrids**

499 Our classification of gene expression patterns in hybrids relative to both parental species  
500 provides insights into the disruptive nature of hybridisation on expression profiles. Figure S6  
501 provides illustrative examples of the pattern of variance characteristic of each gene category.  
502 Among differentially expressed genes, 589 were *melpomene*-like, 344 were *cydno*-like, 12  
503 were 'transgressive', and 701 were intermediate between parental distributions. Considering  
504 all genes regardless of their differential expression between species, 1686 were classed as  
505 *melpomene*-like, 1449 were *cydno*-like, 259 were 'transgressive', and 746 were intermediate  
506  
507

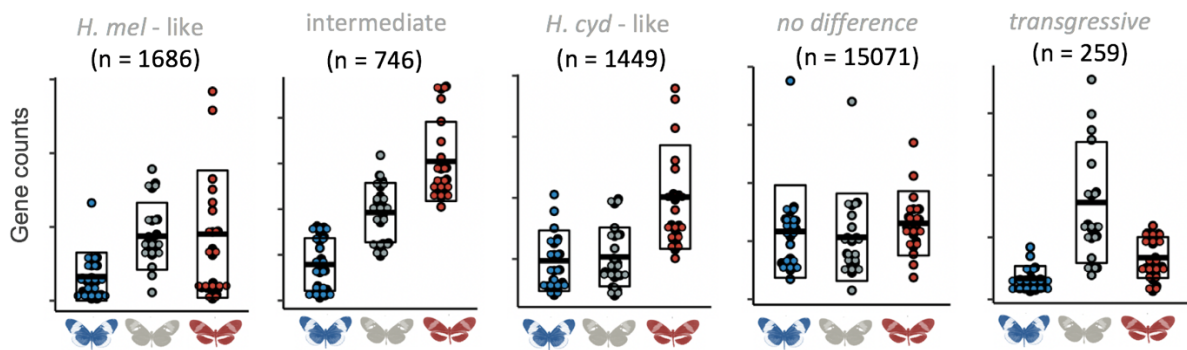

508  
509 **Figure S6.** Example of expression profiles for genes assigned to the different categories  
510 mentioned (e.g. intermediate in F1s). "n =" denotes the number of genes classified in each  
511 category. y-axis indicates the (rlog) normalized gene count. Dots correspond to individual  
512 samples, and are colored in blue for *H. cydno* samples, in gray for F1 hybrids, and in red for  
513 *H. melpomene*. Horizontal black bars indicate mean, with boxplots delineating + and - one  
514 standard deviation, of normalized gene counts.  
515

516  
517  
518  
519  
520  
521  
522  
523  
524  
525  
526  
527  
528  
529

530 **3 vi. Tests of neutrality on gene expression**

531 P<sub>ST</sub> estimates vary significantly between gene categories (Kruskal-Wallis test with post-hoc  
 532 Dunn test with Bonferroni correction, p<0.001 in pairwise comparisons except between  
 533 transgressive and “no differentially expressed” genes), with 11% (n=432/3881) of genes  
 534 showing intermediate or species-like expression in hybrids having P<sub>ST</sub> estimates within the  
 535 95<sup>th</sup> percentile of the F<sub>ST</sub> distribution, compared to 0.02% (n=3/15330) for non-differentially  
 536 expressed genes. The proportion of genes with significant P<sub>ST</sub> estimates is highest within  
 537 genes with intermediate expression in hybrids 23% (n=169/746), followed by *melpomene* and  
 538 *cydno*-like genes (9% (n=159/1686) and 7% (n=104/1449) respectively), and lowest within  
 539 transgressive genes (0% (n=0/259)). To test how these results varied under different assumed  
 540 heritabilities, we recalculated P<sub>ST</sub> under five  $h^2$  values (Figure S5). As expected, the results  
 541 are consistent across this range, with increased support for selection at lower  $h^2$  values.  
 542

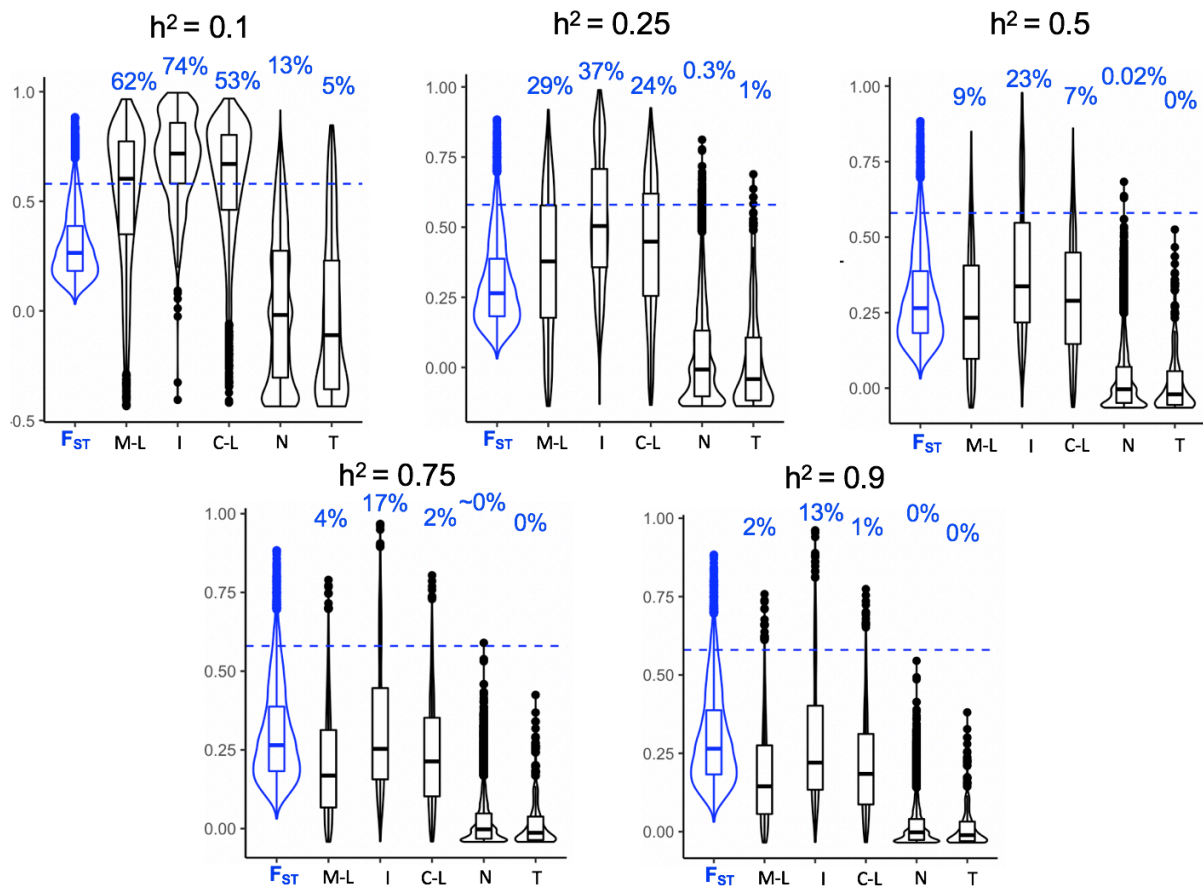

543 **Figure S7.** Median, interquartile range and distributions of F<sub>ST</sub> and P<sub>ST</sub> values (for different  
 544 gene categories), where P<sub>ST</sub> was estimated with varying levels of heritability ( $h^2$ ), indicated on  
 545 top of each panel. Percentages (in blue) indicate the percentages of genes with P<sub>ST</sub> value  
 546 higher than the 95% quantile of F<sub>ST</sub> (indicated by a horizontal dotted blue line), in each  
 547 category.  
 548  
 549

550  
 551

552 **3 vii. Variation in  $P_{ST}$  and  $f_d$  among gene categories**

553

554

555

556

557

558

559

560

$P_{ST}$

|             | H. c-like | intermed. | H. mel-like | no diff. |
|-------------|-----------|-----------|-------------|----------|
| intermed.   | P<0.0001  | -         | -           | -        |
| H. mel-like | P<0.001   | P<0.0001  | -           | -        |
| no diff.    | P<0.0001  | P<0.0001  | P<0.0001    | -        |
| transgres.  | P<0.0001  | P<0.0001  | P<0.0001    | P=0.094  |

561

562

563

564

565

566

567

$f_d$

|             | H. c-like | intermed. | H. mel-like | no diff. |
|-------------|-----------|-----------|-------------|----------|
| intermed.   | P<0.001   | -         | -           | -        |
| H. mel-like | P=1.000   | P<0.010   | -           | -        |
| no diff.    | P<0.0001  | P<0.0001  | P<0.0001    | -        |
| transgres.  | P=0.646   | P<0.001   | P=0.185     | P=1.000  |

568 **Figure S8.** Full pairwise comparisons from a Kruskal-Wallis test with post-hoc Dunn test, with

569 Bonferroni correction (see Figure 5).

570

571

572

573

574

575

576

577

578

579

580

581

582

583

584

585

586

587

588

589

#### 590 4. Supplementary references

591

- 592 1. Moran, D., Softley, R., and Warrant, E.J. (2015). The energetic cost of vision and the  
593 evolution of eyeless Mexican cavefish. *Sci. Adv.* 1, e1500363.
- 594 2. James B. Jaggard, Evan Lloyd, Anders Yuiska, Adam Patch, Yaouen Fily, Johanna E.  
595 Kowalko, Lior Appelbaum, Erik R Duboue, and Alex C. Keene (2020). Cavefish brain  
596 atlases reveal functional and anatomical convergence across independently evolved  
597 populations. *Sci. Adv.* 6, eaba3126.
- 598 3. Rétaux, S., Alié, A., Blin, M., Devos, L., Elipot, Y., and Hinaux, H. (2016). Neural  
599 Development and Evolution in *Astyanax mexicanus*. In *Biology and Evolution of the*  
600 *Mexican Cavefish* (Elsevier), pp. 227–244. Available at:  
601 <https://linkinghub.elsevier.com/retrieve/pii/B9780128021484000128> [Accessed October  
602 3, 2019].
- 603 4. Filteau, M., Pavey, S.A., St-Cyr, J., and Bernatchez, L. (2013). Gene Coexpression  
604 Networks Reveal Key Drivers of Phenotypic Divergence in Lake Whitefish. *Mol. Biol.*  
605 *Evol.* 30, 1384–1396.
- 606 5. Renaut, S., and Bernatchez, L. (2011). Transcriptome-wide signature of hybrid  
607 breakdown associated with intrinsic reproductive isolation in lake whitefish species pairs  
608 (*Coregonus* spp. Salmonidae). *Heredity* 106, 1003–1011.
- 609 6. Sylvester, J.B., Rich, C.A., Loh, Y.-H.E., van Staaden, M.J., Fraser, G.J., and Streelman,  
610 J.T. (2010). Brain diversity evolves via differences in patterning. *Proc. Natl. Acad. Sci.*  
611 107, 9718–9723.
- 612 7. Maan, M.E., Seehausen, O., and Groothuis, T.G.G. (2017). Differential Survival between  
613 Visual Environments Supports a Role of Divergent Sensory Drive in Cichlid Fish  
614 Speciation. *Am. Nat.* 189, 78–85.
- 615 8. Maan, M.E., Hofker, K.D., Alphen, J.J.M. Van, and Seehausen, O. (2006). Sensory Drive  
616 in Cichlid Speciation. 167.
- 617 9. Huber, R., van Staaden, M.J., S, K. Les, and Liem, K.F. (1997). Microhabitat use, trophic  
618 patterns, and the evolution of brain structure in African Cichlids. *Brain. Behav. Evol.* 50,  
619 167–182.
- 620 10. Park, P.J., and Bell, M. a. (2010). Variation of telencephalon morphology of the  
621 threespine stickleback (*Gasterosteus aculeatus*) in relation to inferred ecology. *J. Evol.*  
622 *Biol.* 23, 1261–1277.
- 623 11. Keagy, J., Braithwaite, V.A., and Boughman, J.W. (2018). Brain differences in  
624 ecologically differentiated sticklebacks. *Curr. Zool.* 64, 243–250.
- 625 12. Kotrschal, A., Deacon, A.E., Magurran, A.E., and Kolm, N. (2017). Predation pressure  
626 shapes brain anatomy in the wild. *Evol. Ecol.* 31, 619–633.
- 627 13. Eifert, C., Farnworth, M., Schulz-Mirbach, T., Riesch, R., Bierbach, D., Klaus, S.,  
628 Wurster, A., Tobler, M., Streit, B., Indy, J.R., *et al.* (2015). Brain size variation in  
629 extremophile fish: local adaptation versus phenotypic plasticity: Brain size variation in  
630 extremophile fish. *J. Zool.* 295, 143–153.

- 631 14. Gonda, a., Herczeg, G., and MerilÄ, J. (2009). Adaptive brain size divergence in nine-  
632 spined sticklebacks (*Pungitius pungitius*)? *J. Evol. Biol.* 22, 1721–1726.
- 633 15. McBride, C.S., Baier, F., Omondi, A.B., Spitzer, S.A., Lutomiah, J., Sang, R., Ignell, R.,  
634 and Vosshall, L.B. (2014). Evolution of mosquito preference for humans linked to an  
635 odorant receptor. *Nature* 515, 222–227.
- 636 16. Dekker, T., Ibba, I., Siju, K.P., Stensmyr, M.C., and Hansson, B.S. (2006). Olfactory  
637 shifts parallel superspecialism for toxic fruit in *Drosophila melanogaster* sibling, *D.*  
638 *sechellia*. *Curr. Biol. CB* 16, 101–9.
- 639 17. Prieto-godino, L.L., Rytz, R., Cruchet, S., Ruta, V., Peraro, M.D., Benton, R., Abuin, L.,  
640 and Silbering, A.F. (2017). Evolution of Acid-Sensing Olfactory Circuits in Article  
641 Evolution of Acid-Sensing Olfactory Circuits in *Drosophilids*. 661–676.
- 642 18. Keeseey, I.W., Grabe, V., Knaden, M., and Hansson, B.S. (2020). Divergent sensory  
643 investment mirrors potential speciation via niche partitioning across *Drosophila*. *eLife* 9,  
644 e57008.
- 645 19. Montgomery, S.H., and Merrill, R.M. (2016). Divergence in brain composition during the  
646 early stages of ecological specialization in *Heliconius* butterflies. *J. Evol. Biol.* 30, 571–  
647 582.
- 648 20. Filchak, K.E., Roethele, J.B., and Feder, J.L. (2000). Natural selection and sympatric  
649 divergence in the apple maggot *Rhagoletis pomonella*. 407, 4.
- 650 21. Linn, C., Feder, J.L., Nojima, S., Dambroski, H.R., Berlocher, S.H., and Roelofs, W.  
651 (2003). Fruit odor discrimination and sympatric host race formation in *Rhagoletis*. 10–13.
- 652 22. Tait, C., Batra, S., Ramaswamy, S.S., Feder, J.L., and Olsson, S.B. (2016). Sensory  
653 specificity and speciation: a potential neuronal pathway for host fruit odour discrimination  
654 in *Rhagoletis pomonella*. *Proc. R. Soc. B Biol. Sci.* 283, 20162101.
- 655 23. Kozak, K.M., Wahlberg, N., Neild, A.F.E., Dasmahapatra, K.K., Mallet, J., and Jiggins,  
656 C.D. (2015). Multilocus Species Trees Show the Recent Adaptive Radiation of the  
657 Mimetic *Heliconius* Butterflies. *Syst. Biol.* 64, 505–524.
- 658 24. Martin, S.H., Dasmahapatra, K.K., Nadeau, N.J., Salazar, C., Walters, J.R., Simpson, F.,  
659 Blaxter, M., Manica, A., Mallet, J., and Jiggins, C.D. (2013). Genome-wide evidence for  
660 speciation with gene flow in *Heliconius* butterflies. *Genome Res.* 23, 1817–1828.
- 661 25. Estrada, C., and Jiggins, C.D. (2002). Patterns of pollen feeding and habitat preference  
662 among *Heliconius* species. *Ecol. Entomol.* 27, 448–456.
- 663 26. Merot, C., Salazar, C., Merrill, R.M., Jiggins, C.D., and Joron, M. (2017). What shapes  
664 the continuum of reproductive isolation? Lessons from *Heliconius* butterflies. *Proc. R.*  
665 *Soc. B Biol. Sci.* 284, 10.
- 666 27. Merrill, R.M., Wallbank, R.W.R., Bull, V., Salazar, P.C.A., Mallet, J., Stevens, M., and  
667 Jiggins, C.D. (2012). Disruptive ecological selection on a mating cue. *Proc. R. Soc. B*  
668 *Biol. Sci.* 279, 4907–4913.
- 669 28. Naisbit, R.E., Jiggins, C.D., and Mallet, J. (2001). Disruptive sexual selection against  
670 hybrids contributes to speciation between *Heliconius cydno* and *Heliconius melpomene*.  
671 *Proc. R. Soc. Lond. B Biol. Sci.* 268, 1849–1854.

- 672 29. Mallet, J., Beltrán, M., Neukirchen, W., and Linares, M. (2007). Natural hybridization in  
673 heliconiine butterflies: the species boundary as a continuum. *BMC Evol. Biol.* 7, 28.
- 674 30. Arias, C.F., Salazar, C., Rosales, C., Kronforst, M.R., Linares, M., Bermingham, E., and  
675 McMillan, W.O. (2014). Phylogeography of *Heliconius cydno* and its closest relatives:  
676 disentangling their origin and diversification. *Mol. Ecol.* 23, 4137–4152.
- 677 31. Seymoure, B.M. (2016). *Heliconius In A New Light: The Effects of Light Environments on*  
678 *Mimetic Coloration, Behavior, and Visual Systems.*
- 679 32. Mérot, C., Mavárez, J., Evin, A., Dasmahapatra, K.K., Mallet, J., Lamas, G., and Joron,  
680 M. (2013). Genetic differentiation without mimicry shift in a pair of hybridizing *Heliconius*  
681 species (Lepidoptera: Nymphalidae): Mimicry and Hybridization in Butterflies. *Biol. J.*  
682 *Linn. Soc.* 109, 830–847.
- 683 33. Kronforst, M.R., Young, L.G., Blume, L.M., and Gilbert, L.E. (2006). MULTILOCUS  
684 ANALYSES OF ADMIXTURE AND INTROGRESSION AMONG HYBRIDIZING  
685 HELICONIUS BUTTERFLIES. *Evolution* 60, 1254–1268.
- 686 34. Kronforst, M.R., Young, L.G., Kapan, D.D., McNeely, C., O'Neill, R.J., and Gilbert, L.E.  
687 (2006). Linkage of butterfly mate preference and wing color preference cue at the  
688 genomic location of wingless. *Proc. Natl. Acad. Sci.* 103, 6575–6580.
- 689 35. James Mallet, W. Owen McMillan, Chris D. Jiggins (1998). Mimicry and warning color at  
690 the boundary between races and species. In *Endless Forms: Species and Speciation*  
691 (Oxford: Oxford University Press).
- 692 36. Benson, W.W., Brown, K.S., and Gilbert, L.E. (1975). COEVOLUTION OF PLANTS AND  
693 HERBIVORES: PASSION FLOWER BUTTERFLIES. *Evolution* 29, 659–680.
- 694 37. Naisbit, R.E. (2001). Ecological divergence and speciation in *Heliconius cydno* and *H.*  
695 *melpomene*.
- 696 38. James Mallet (1980). A laboratory study of gregarious roosting in the butterfly *Heliconius*  
697 *melpomene*.
- 698 39. Ott, S.R. (2008). Confocal microscopy in large insect brains: Zinc–formaldehyde fixation  
699 improves synapsin immunostaining and preservation of morphology in whole-mounts. *J.*  
700 *Neurosci. Methods* 172, 220–230.
- 701 40. Montgomery, S.H., Merrill, R.M., and Ott, S.R. (2016). Brain composition in *Heliconius*  
702 butterflies, posteclosion growth and experience-dependent neuropil plasticity: Anatomy  
703 and plasticity of *heliconius* brains. *J. Comp. Neurol.* 524, 1747–1769.
- 704 41. Douglas Bates, Martin Maechler, Ben Bolker, Steven Walker, Rune Haubo Bojesen  
705 Christensen, Henrik Singmann, Bin Dai, Fabian Scheipl, Gabor Grothendieck, Peter  
706 Green, John Fox Package “lme4.” Available at: <https://github.com/lme4/lme4/>.
- 707 42. Benjamini, Y., and Hochberg, Y. (1995). Controlling the False Discovery Rate: A  
708 Practical and Powerful Approach to Multiple Testing. *J. R. Stat. Soc. Ser. B Methodol.*  
709 57, 289–300.
- 710 43. Warton, D.I., Duursma, R.A., Falster, D.S., and Taskinen, S. (2012). smatr 3- an R  
711 package for estimation and inference about allometric lines: The smatr 3 - an R  
712 package. *Methods Ecol. Evol.* 3, 257–259.

- 713 44. Montgomery, S.H. (2013). The Human Frontal Lobes: Not Relatively Large but Still  
714 Disproportionately Important? A Commentary on Barton and Venditti. *Brain. Behav.*  
715 *Evol.* 82, 147–149.
- 716 45. The Heliconius Genome Consortium (2012). Butterfly genome reveals promiscuous  
717 exchange of mimicry adaptations among species. *Nature* 487, 94–98.
- 718 46. Goslee, S.C., and Urban, D.L. (2007). The **ecodist** Package for Dissimilarity-based  
719 Analysis of Ecological Data. *J. Stat. Softw.* 22. Available at:  
720 <http://www.jstatsoft.org/v22/i07/> [Accessed May 30, 2020].
- 721 47. Silva, S., Blondeau, Da, and Silva, A., Da (2018). Pstat: An R Package to Assess  
722 Population Differentiation in Phenotypic Traits. *R J.* 10, 447.
- 723 48. Zwarts, L., Vanden Broeck, L., Cappuyens, E., Ayroles, J.F., Magwire, M.M., Vulsteke, V.,  
724 Clements, J., Mackay, T.F.C., and Callaerts, P. (2015). The genetic basis of natural  
725 variation in mushroom body size in *Drosophila melanogaster*. *Nat. Commun.* 6, 10115.
- 726 49. R Core Team R: a language and environment for statistical computing. 16.
- 727 50. Rossi, M., Hausmann, A.E., Thurman, T.J., Montgomery, S.H., Papa, R., Jiggins, C.D.,  
728 McMillan, W.O., and Merrill, R.M. (2020). Visual mate preference evolution during  
729 butterfly speciation is linked to neural processing genes (Evolutionary Biology) Available  
730 at: <http://biorxiv.org/lookup/doi/10.1101/2020.03.22.002121> [Accessed May 30, 2020].
- 731 51. Davey, J.W., Chouteau, M., Barker, S.L., Maroja, L., Baxter, S.W., Simpson, F., Merrill,  
732 R.M., Joron, M., Mallet, J., Dasmahapatra, K.K., *et al.* (2015). Major Improvements to  
733 the *Heliconius melpomene* Genome Assembly Used to Confirm 10 Chromosome Fusion  
734 Events in 6 Million Years of Butterfly Evolution. *G3* 6, 695–708.
- 735 52. Pinharanda, A., Rousselle, M., Martin, S.H., Hanly, J.J., Davey, J.W., Kumar, S., Galtier,  
736 N., and Jiggins, C.D. (2019). Sexually dimorphic gene expression and transcriptome  
737 evolution provide mixed evidence for a fast-Z effect in *Heliconius*. *J. Evol. Biol.* 32, 194–  
738 204.
- 739 53. Dobin, A., Davis, C.A., Schlesinger, F., Drenkow, J., Zaleski, C., Jha, S., Batut, P.,  
740 Chaisson, M., and Gingeras, T.R. (2013). STAR: ultrafast universal RNA-seq aligner.  
741 *Bioinformatics* 29, 15–21.
- 742 54. Li, H., Handsaker, B., Wysoker, A., Fennell, T., Ruan, J., Homer, N., Marth, G.,  
743 Abecasis, G., Durbin, R., and 1000 Genome Project Data Processing Subgroup (2009).  
744 The Sequence Alignment/Map format and SAMtools. *Bioinformatics* 25, 2078–2079.
- 745 55. Anders, S., Pyl, P.T., and Huber, W. (2015). HTSeq--a Python framework to work with  
746 high-throughput sequencing data. *Bioinformatics* 31, 166–169.
- 747 56. Love, M.I., Huber, W., and Anders, S. (2014). Moderated estimation of fold change and  
748 dispersion for RNA-seq data with DESeq2. *Genome Biol.* 15, 550.
- 749 57. Montgomery, S.H., and Mank, J.E. (2016). Inferring regulatory change from gene  
750 expression: the confounding effects of tissue scaling. *Mol. Ecol.* 25, 5114–5128.
- 751 58. Uebbing, S., Künstner, A., Mäkinen, H., Backström, N., Bolivar, P., Burri, R., Dutoit, L.,  
752 Mugal, C.F., Nater, A., Aken, B., *et al.* (2016). Divergence in gene expression within and  
753 between two closely related flycatcher species. *Mol. Ecol.* 25, 2015–2028.



- 754 59. Martin, S.H., Davey, J.W., Salazar, C., and Jiggins, C.D. (2019). Recombination rate  
755 variation shapes barriers to introgression across butterfly genomes. *PLOS Biol.* *17*,  
756 e2006288.
- 757 60. Jones, P., Binns, D., Chang, H.-Y., Fraser, M., Li, W., McAnulla, C., McWilliam, H.,  
758 Maslen, J., Mitchell, A., Nuka, G., *et al.* (2014). InterProScan 5: genome-scale protein  
759 function classification. *Bioinformatics* *30*, 1236–1240.
- 760 61. Alexa, A., and Rahnenfuhrer, J. Gene set enrichment analysis with topGO. Available at:  
761 <http://www.mpi-sb.mpg.de/~alexa>.
- 762 62. Kinoshita, M., Shimohigashi, M., Tominaga, Y., Arikawa, K., and Homberg, U. (2015).  
763 Topographically distinct visual and olfactory inputs to the mushroom body in the  
764 Swallowtail butterfly, *Papilio xuthus*: Visual inputs in butterfly mushroom body. *J. Comp.*  
765 *Neurol.* *523*, 162–182.
- 766 63. Homberg, U., Hofer, S., Pfeiffer, K., and Gebhardt, S. (2003). Organization and neural  
767 connections of the anterior optic tubercle in the brain of the locust, *Schistocerca gregaria*.  
768 *J. Comp. Neurol.* *462*, 415–430.
- 769 64. Uwe Homberg, and Stefan Würden Movement-sensitive, polarization-sensitive, and  
770 light-sensitive neurons of the medulla and accessory medulla of the locust, *Schistocerca*  
771 *gregaria*. *J. Comp. Neurol.* *386*, 329–346.
- 772 65. Borst, A. (2009). *Drosophila's View on Insect Vision*. *Curr. Biol.* *19*, R36–R47.
- 773 66. Pfeiffer, K., Kinoshita, M., and Homberg, U. (2005). Polarization-Sensitive and Light-  
774 Sensitive Neurons in Two Parallel Pathways Passing Through the Anterior Optic  
775 Tubercle in the Locust Brain. *J. Neurophysiol.* *94*, 3903–3915.
- 776 67. Mappes, M., and Homberg, U. (2007). Surgical lesion of the anterior optic tract abolishes  
777 polarotaxis in tethered flying locusts, *Schistocerca gregaria*. *J. Comp. Physiol. A* *193*,  
778 43–50.
- 779 68. Dell'Aglio, D.D., Troscianko, J., McMillan, W.O., Stevens, M., and Jiggins, C.D. (2018).  
780 The appearance of mimetic *Heliconius* butterflies to predators and conspecifics.  
781 *Evolution* *72*, 2156–2166.
- 782 69. Jiggins, C.D., Naisbit, R.E., Coe, R.L., and Mallet, J. (2001). Reproductive isolation  
783 caused by colour pattern mimicry. *Nature* *411*, 302–305.
- 784 70. Merrill, R.M., Naisbit, R.E., Mallet, J., and Jiggins, C.D. (2013). Ecological and genetic  
785 factors influencing the transition between host-use strategies in sympatric *Heliconius*  
786 butterflies. *J. Evol. Biol.* *26*, 1959–1967.
- 787
